# Supplementary material for: Aberrant chromatin landscape following loss of the H3.3 chaperone Daxx in haematopoietic precursors leads to Pu.1-mediated neutrophilia and inflammation
Source: PubMed Central journal article supplement (PMC8683376; doi:10.1038/s41556-021-00774-y), 2021-12-07

Original files used in Extended Data Figure 2a

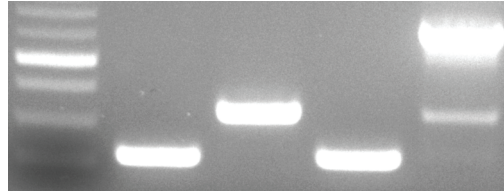

Original files used in Extended Data Figure 2d

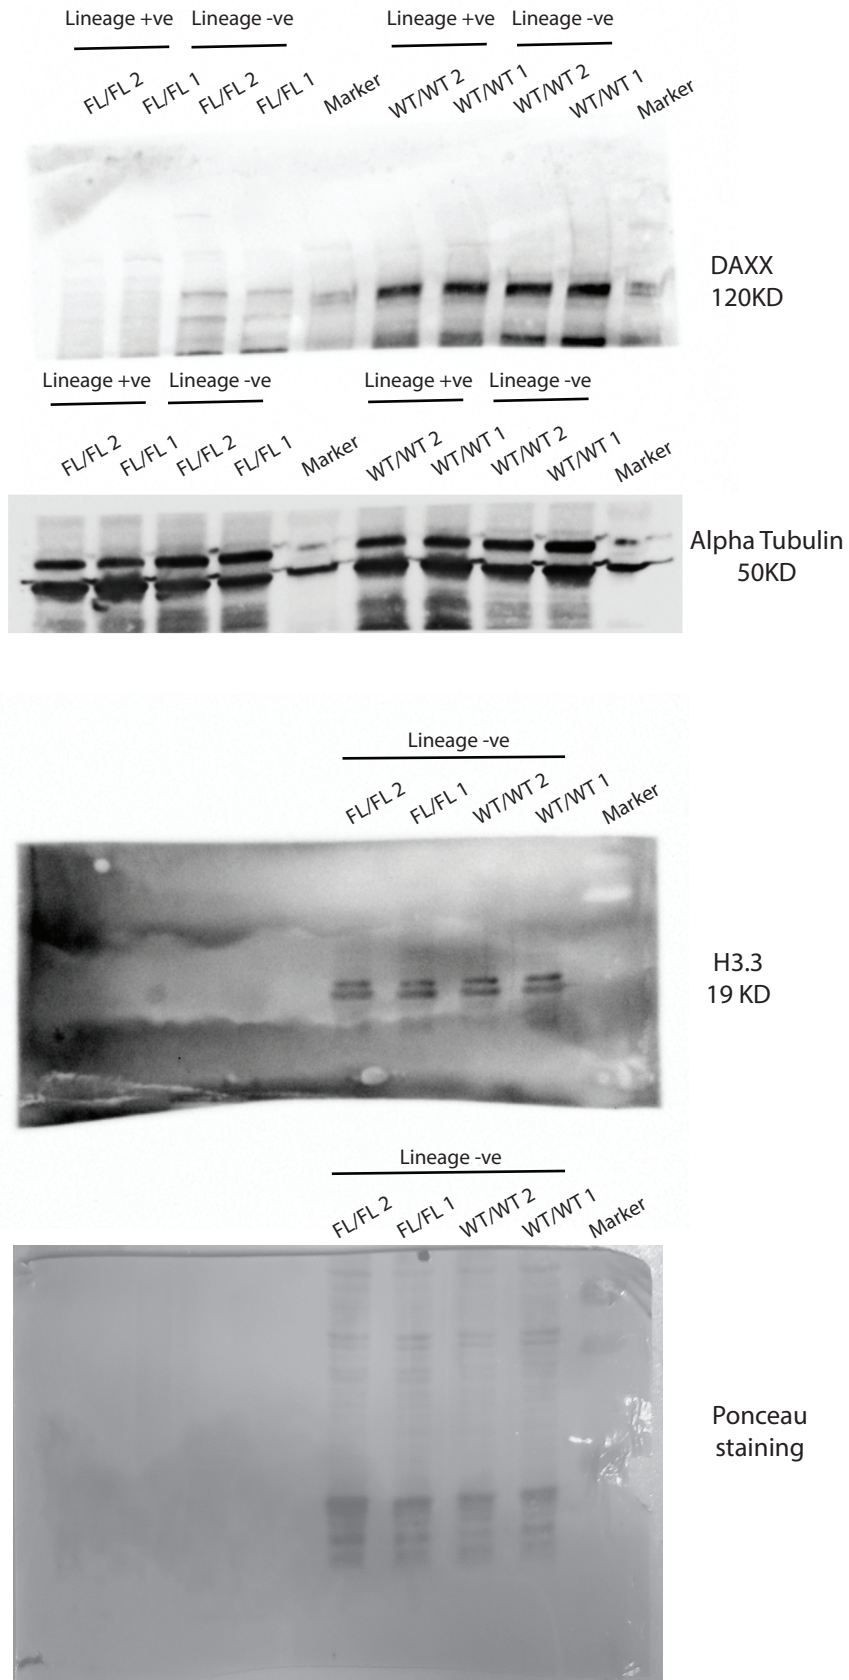

Supplement: 41556_2021_774_MOESM15_ESM.pdf [file 41556_2021_774_MOESM15_ESM.pdf]
