# Supplementary material for: Aberrant chromatin landscape following loss of the H3.3 chaperone Daxx in haematopoietic precursors leads to Pu.1-mediated neutrophilia and inflammation
Source: PubMed Central journal article supplement (PMC8683376; doi:10.1038/s41556-021-00774-y), 2021-12-07

Original file used in Extended Data Figure 5a

Daxx recombination  
(not used in paper)

Hira recombination  
(in part used in Ext. Data Fig. 5a)

+/+ Cre +/-  
Hira F/F Cre +/-  
Daxx F/F Hira F/F Cre +/-  
Water control

+/+ Cre +/-  
Hira F/F Cre +/-  
Daxx F/F Hira F/F Cre +/-  
Water control

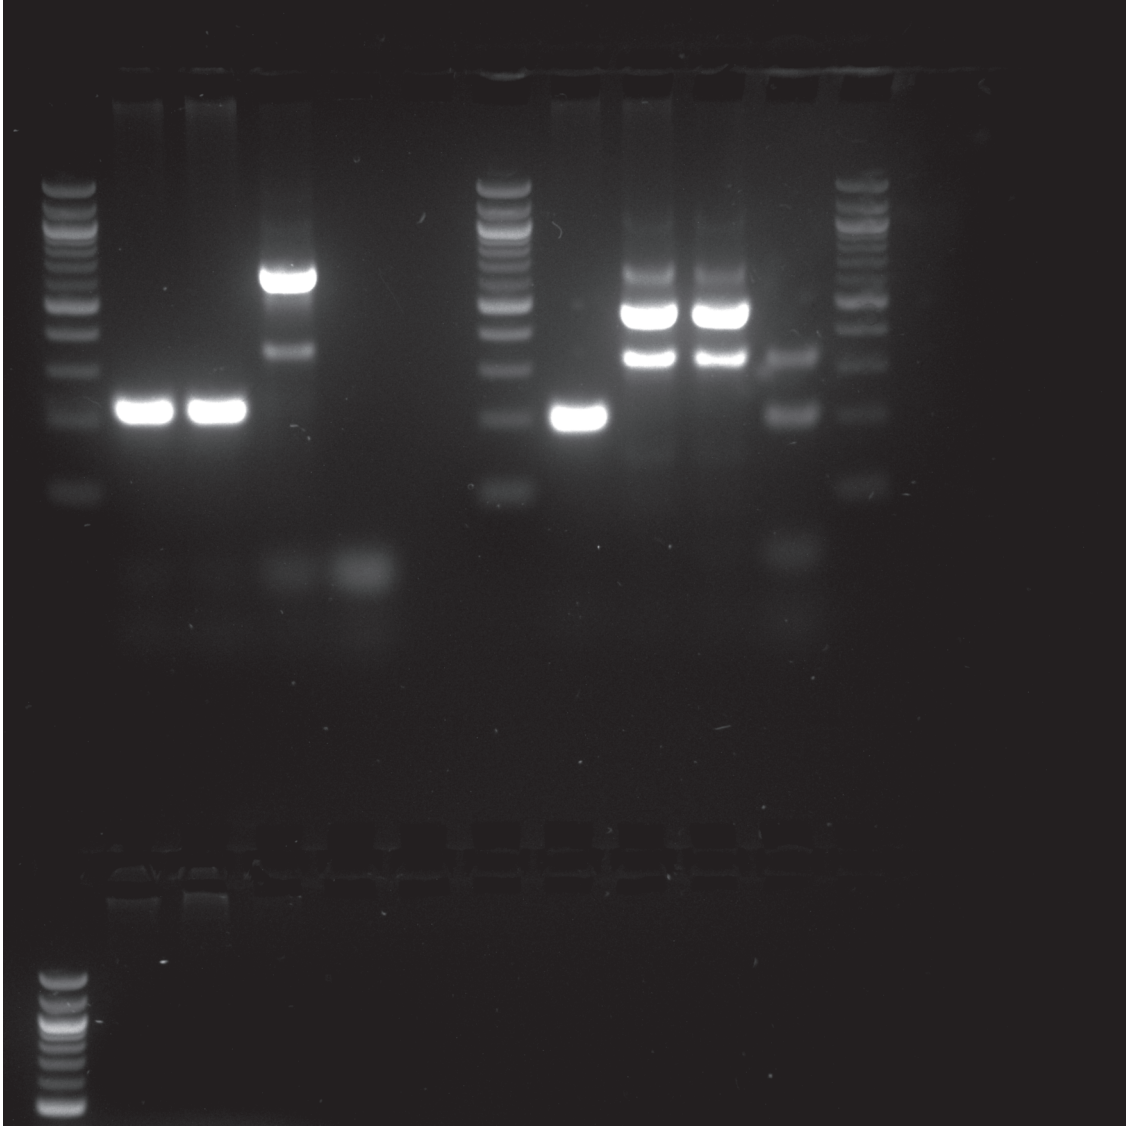

Not used in paper

Original blots used in Extended Data Figure 5c

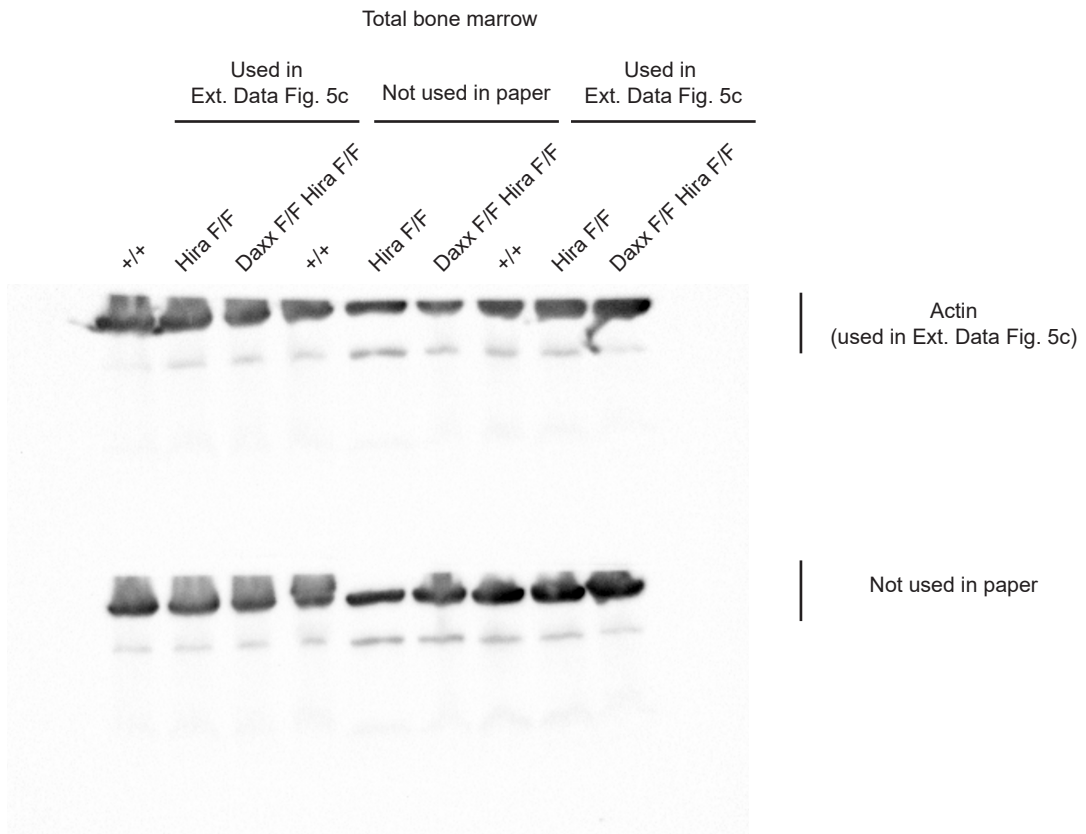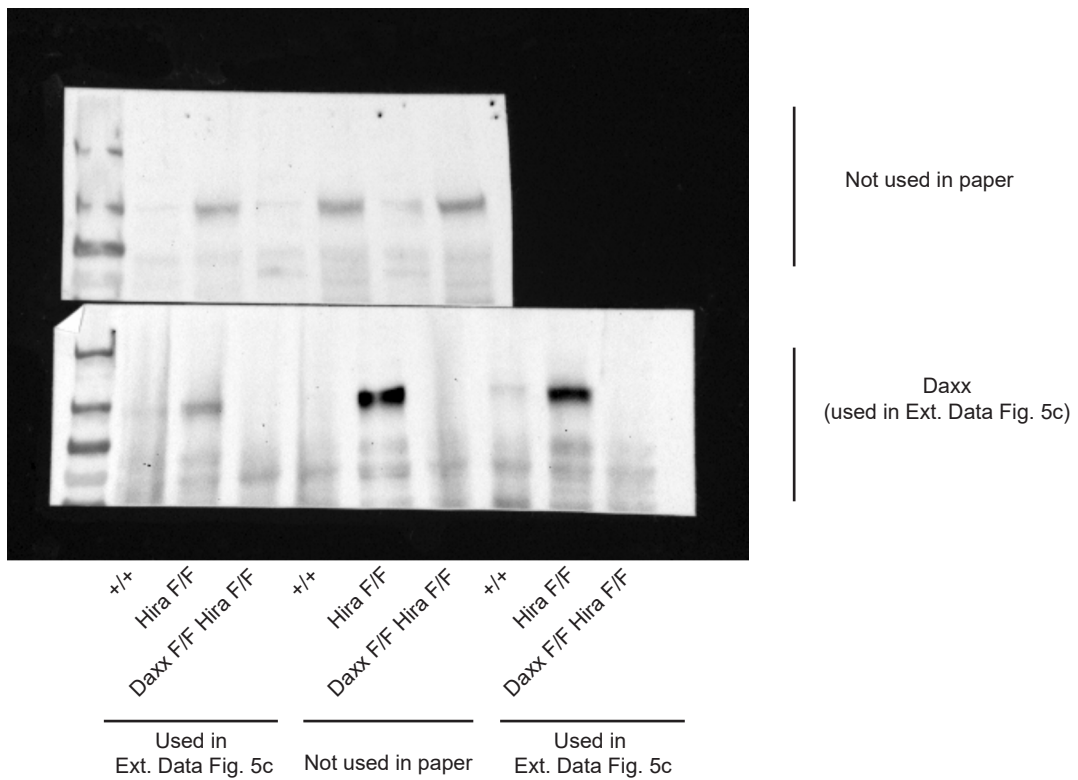

Supplement: 41556_2021_774_MOESM21_ESM.pdf [file 41556_2021_774_MOESM21_ESM.pdf]
